# Supplementary material for: Acoustic Characterization of Potential Quiet Areas in Dortmund, Germany
Source: Preprints.org preprint supplement (doi:10.20944/preprints202402.1382.v2), 2024-03-11

# Appendix A

## Kolmogorov-Smirnov test of normality

1.1 All sound factors have p< 0.001 and thus significantly deviate from a normal distribution.

| **Tests of Normality** | | | |
| --- | --- | --- | --- |
|  | Kolmogorov-Smirnova | | |
| Statistic | df | Sig. |
| A Weighted (Mean dB) | .125 | 282764 | <.001 |
| ACI | .204 | 282763 | <.001 |
| TFSDBirds | .198 | 282763 | <.001 |
| BIO | .104 | 282763 | <.001 |
| NP | .052 | 282763 | <.001 |
| NDSI | .060 | 282763 | <.001 |
| M | .278 | 282763 | <.001 |
| Ht | .210 | 282763 | <.001 |
| 1. Lilliefors Significance Correction | | | |

Normal Q-Q plots of sound factors illustrate the K-S findings


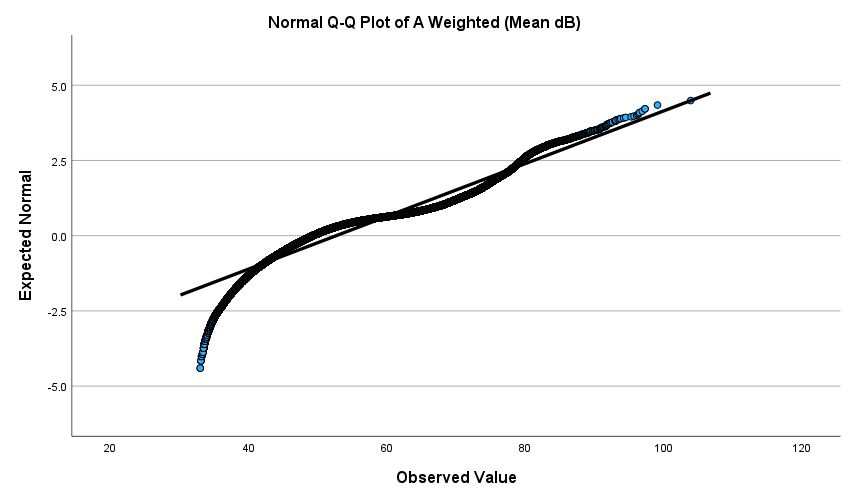


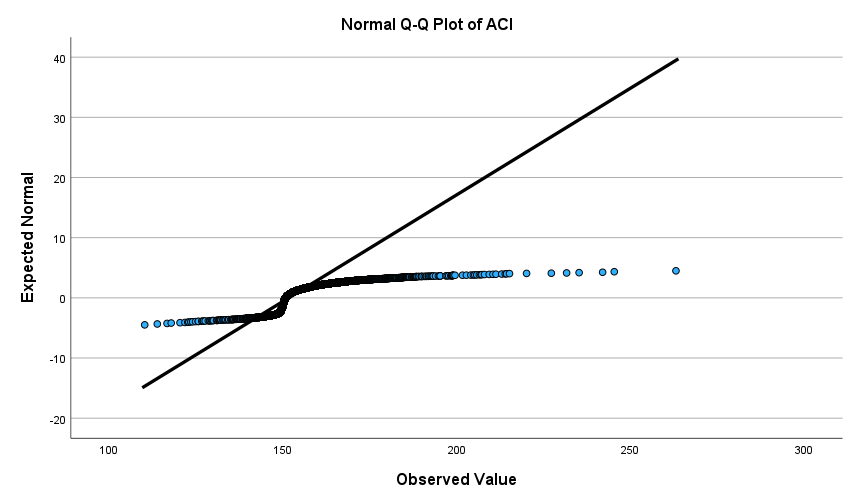


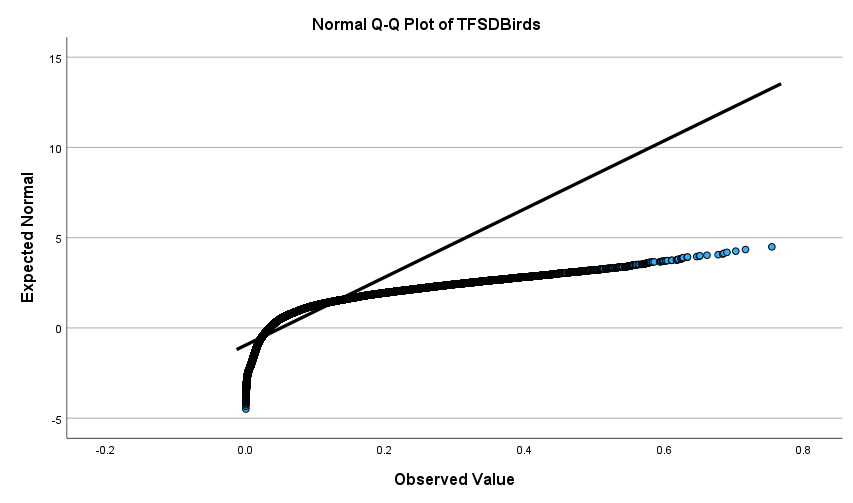


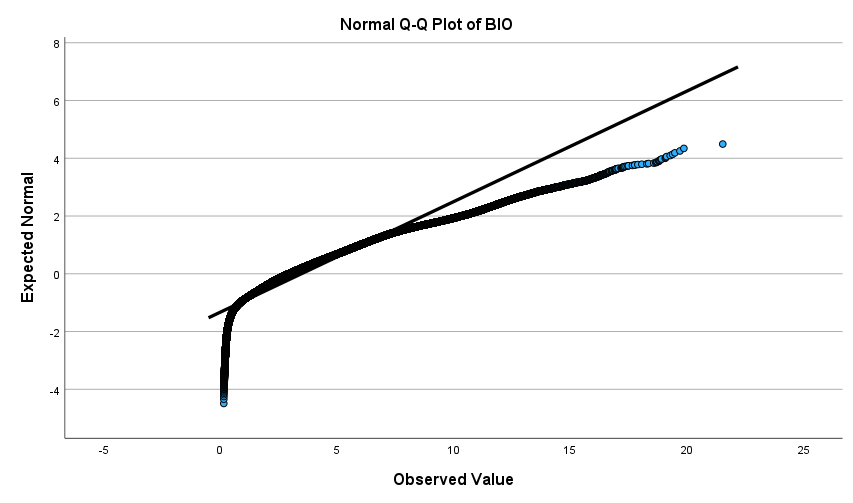


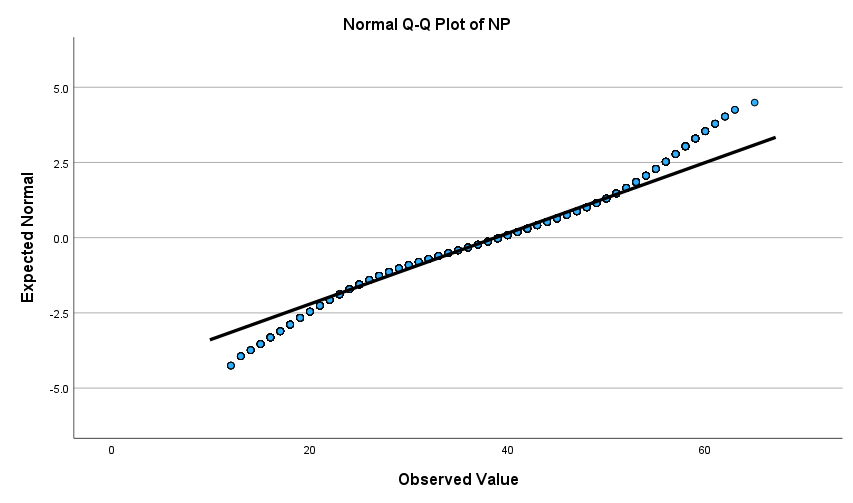


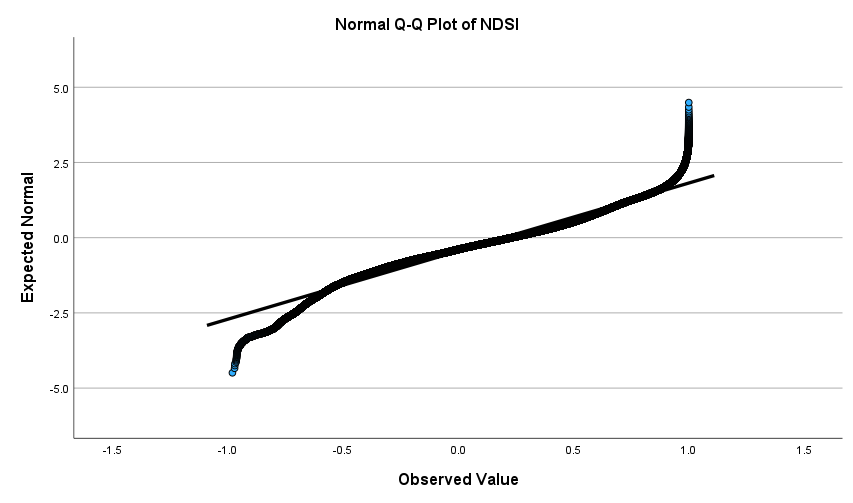


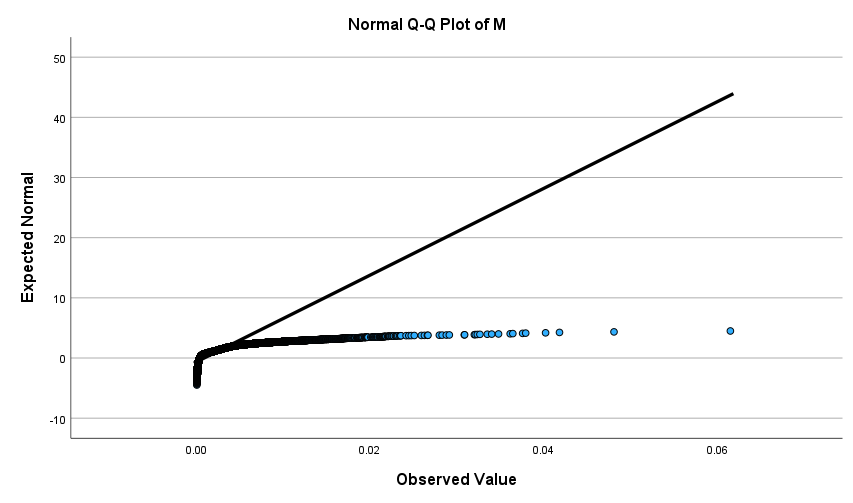


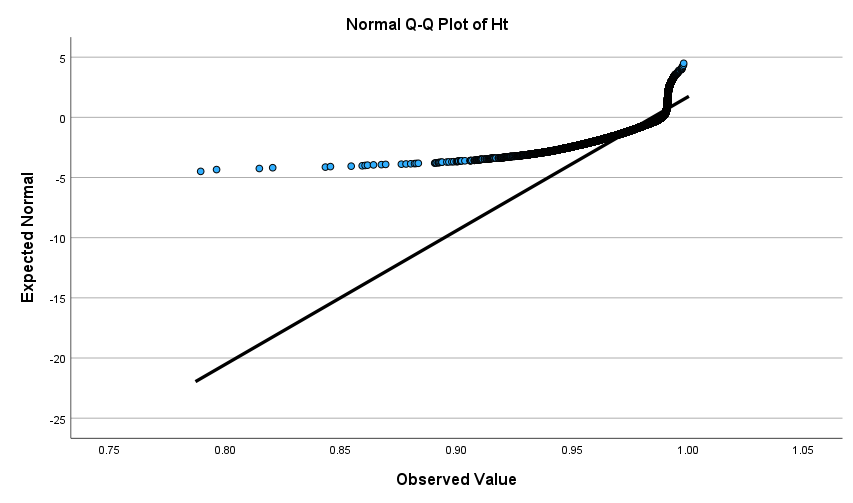


## Spearman’s Correlation of BPI and BIO in only quiet areas


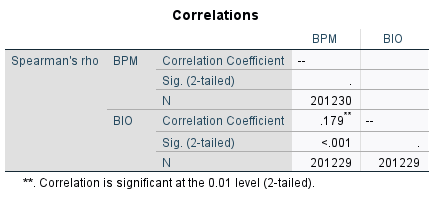


## Spearman’s Correlation of BPI and BIO in only noise hot spots

##
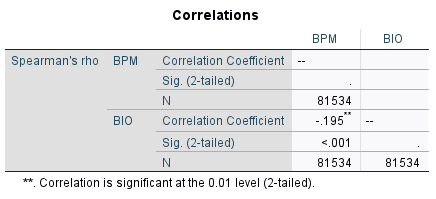

Supplement: Supplementary file 1 [file supplementary]
